# Supplementary material for: A new NbO type metal–organic framework for high acetylene and methane storage
Source: Royal Society of Chemistry journal article supplement (doi:10.1039/c5ra14633j), 2015-01-01
Supplement: c5ra14633j1.pdf [file c5ra14633j1.pdf]

## Supporting Information

### A New NbO Type Metal-Organic Framework for High Acetylene and Methane Storage

Xing Duan<sup>a</sup>, Huizhen Wang<sup>a</sup>, Zhiyu Wang<sup>a</sup>, Yuanjing Cui<sup>a</sup>, Yu Yang<sup>a</sup>, Banglin Chen<sup>\*abc</sup> and Guodong Qian<sup>\*a</sup>

<sup>a</sup> *State Key Laboratory of Silicon Materials, Cyrus Tang Center for Sensor Materials and Applications, Department of Materials Science & Engineering, Zhejiang University, Hangzhou 310027, PR China.*

<sup>b</sup> *Department of Chemistry, University of Texas at San Antonio, One UTSA Circle, San Antonio, Texas 78249-0698, USA.*

<sup>c</sup> *Department of Chemistry, Faculty of Science, King Abdulaziz University, Jeddah 22254, Saudi Arabia.*

**X-ray Collection and Structure Determination:** Crystallographic measurements for **ZJU-9** were taken on an Oxford Xcalibur Gemini Ultra diffractometer with an Atlas detector using graphite-monochromatic Mo  $K_{\alpha}$  radiation ( $\lambda = 0.71073\text{\AA}$ ) at 296 K. The determinations of the unit cells and data collections for the crystals of **ZJU-9** were performed with CrysAlisPro. The data sets were corrected by empirical absorption correction using spherical harmonics, implemented in the SCALE3 ABSPACK scaling algorithm.<sup>1</sup> All structures were determined by direct methods and refined by the full-matrix least-squares method with the SHELX-97 program package.<sup>2</sup> All non-hydrogen atoms, including solvent molecules, were located successfully from Fourier maps and were refined anisotropically. H atoms on C atoms were generated geometrically. The solvent molecules in **ZJU-9** are highly disordered. The SQUEEZE subroutine of the PLATON software suit was used to remove the scattering from the highly disordered guest molecules.<sup>3</sup> Crystallographic data are summarized in *Table 1*.

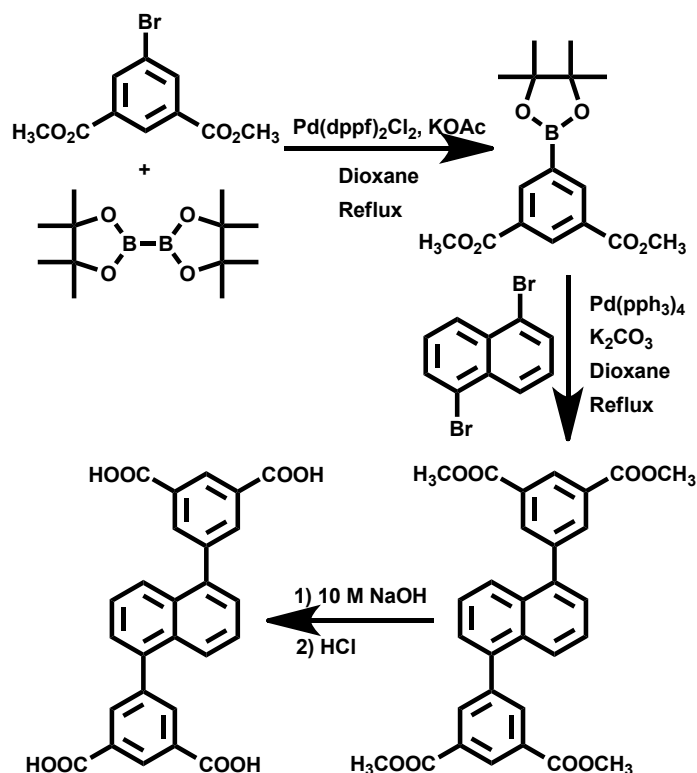

*Scheme S1.* Synthetic route to the organic linker used to construct **ZJU-9**.

**Synthesis of the organic linker H4NPA:** H<sub>4</sub>NPA was synthesized via Suzuki coupling followed by hydrolysis and acidification as shown in *Scheme S1*.

Dimethyl-(5-pinacolboryl)isophthalate was synthesized by stirring the mixture of dimethyl 5-bromo-benzene-1,3-dicarboxylate (5.4 g, 19.8 mmol), bis(pinacolato)diborane (6.0 g, 23.6 mmol), potassium acetate (5.6 g, 57.2 mmol), Pd(dppf)<sub>2</sub>Cl<sub>2</sub> (0.2 g, 0.28 mmol), and dried 1,4-dioxane (50 mL) at 80°C for 24 h and afterward extracted with ethyl acetate (20 mL). The organic layer was dried with anhydrous MgSO<sub>4</sub> and the solvent was removed in a vacuum. The crude product was purified by column chromatography (silica gel, ethylacetate/petroleum ether, 1:8 v/v). Yield: 66%. <sup>1</sup>H NMR (500 MHz, CDCl<sub>3</sub>): δ = 1.37 (m, 12 H), 3.95 (s, 6 H), 8.64 (d, 2 H), 8.76 (s, 1H) ppm.

1, 5-dibromo-naphthaline (2.86 g, 10.0 mmol), dimethyl-(5-pinacolboryl)isophthalate (9.26 g, 30.0 mmol), and K<sub>2</sub>CO<sub>3</sub> (13.82 g, 100.0 mmol) were added to 1,4- dioxane (250 mL), and the mixture deaerated under Ar for 15 min. Pd(PPh<sub>3</sub>)<sub>4</sub> (0.47 g, 0.43 mmol) was added to the reaction mixture with stirring, and the mixture heated to 80°C for 3 days under Ar. The resultant mixture was evaporated to dryness and taken up in CHCl<sub>3</sub> which had been dried over MgSO<sub>4</sub>. The CHCl<sub>3</sub> solution was evaporated to dryness and purified by column chromatography (silica gel, ethyl acetate/petroleum ether, 1:10 v/v). Yield: 75%. <sup>1</sup>H NMR (500 MHz, CDCl<sub>3</sub>), δ = 3.98 (s, 12 H), 7.47 (d, 2H), 7.52 (d, 2 H), 7.80 (d, 2H), 8.39 (s, 4H), 8.79 (s, 2H) ppm.

1, 5-naphthaline-dimethyl-isophthalate (H<sub>4</sub>NPA-Me) (3.07 g, 6.00mmol) was then suspended in a mixture of 1,4-dioxane (20 mL), to which 50 mL of 10 M NaOH aqueous solution was added. The mixture was stirred under reflux overnight and the THF were removed under a vacuum. Dilute HCl was added to the remaining aqueous solution until the solution was at pH = 2. The solid was collected by filtration, washed with water, and dried to give 1, 5-naphthaline-*m*-phthalic acid (H<sub>4</sub>NPA) (2.63 g, 97% yield). <sup>1</sup>H NMR (500 MHz, DMSO), δ = 7.60 (d, 2H), 7.64 (d, 2H), 7.81 (d, 2H), 8.59 (s, 2H) 8.25 (s, 4H) 13.48 (s, 4H) ppm.

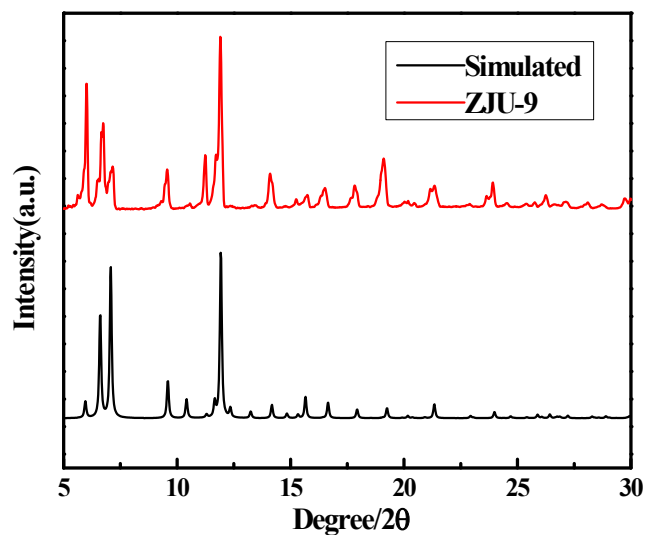

**Fig. S1.** PXRD patterns of as-synthesized MOF **ZJU-9** (red) and the simulated from single crystal structure (black).

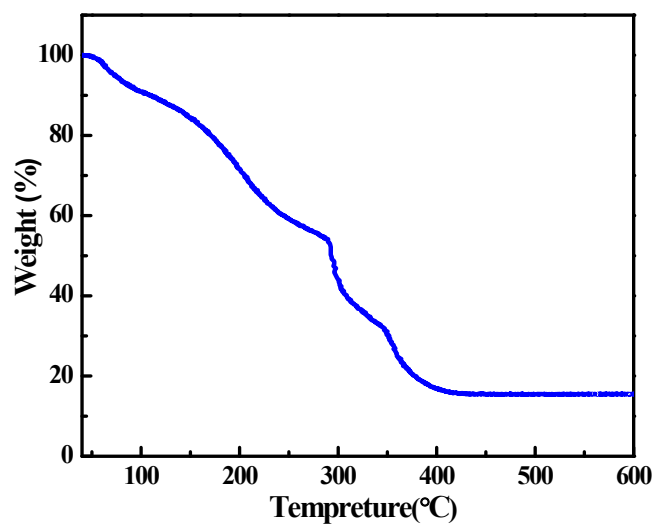

**Fig. S2.** TGA curve of as-synthesized **ZJU-9** in flowing  $N_2$  atmosphere.

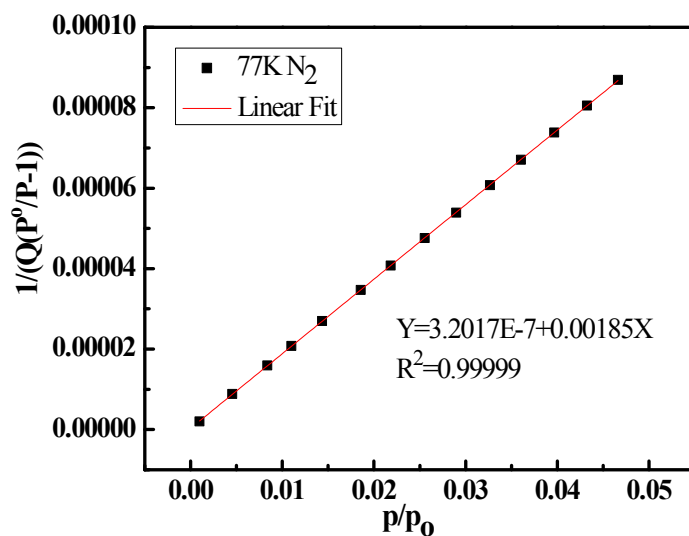

$$S_{\text{BET}}=(1/(3.2017 \times 10^{-7}+0.00185))/22414 \times 6.023 \times 10^{23} \times 0.162 \times 10^{-18}=2352.67 \text{ m}^2/\text{g}$$

**Fig. S3.** BET plot of **ZJU-9a** under the activation of 100 °C . Only the range below  $P/P_0 = 0.05$  satisfies the first consistency criterion for applying the BET theory.

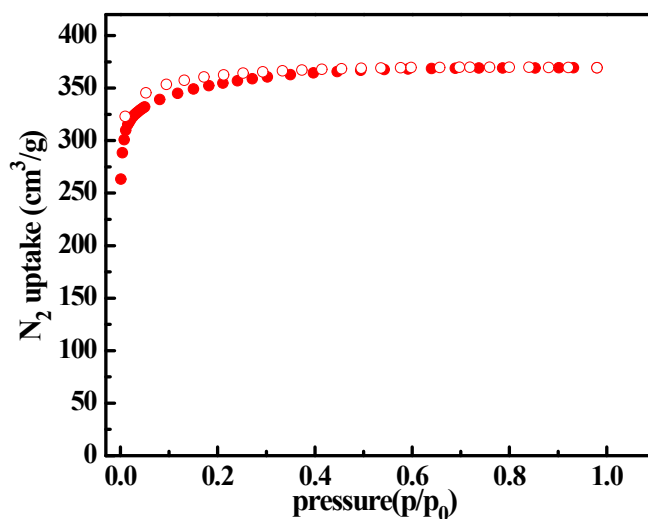

**Fig. S4.** N<sub>2</sub> sorption isotherm of **ZJU-9a** at 77 K under the activation of 25 °C. Solid symbols: adsorption, open symbols: desorption.

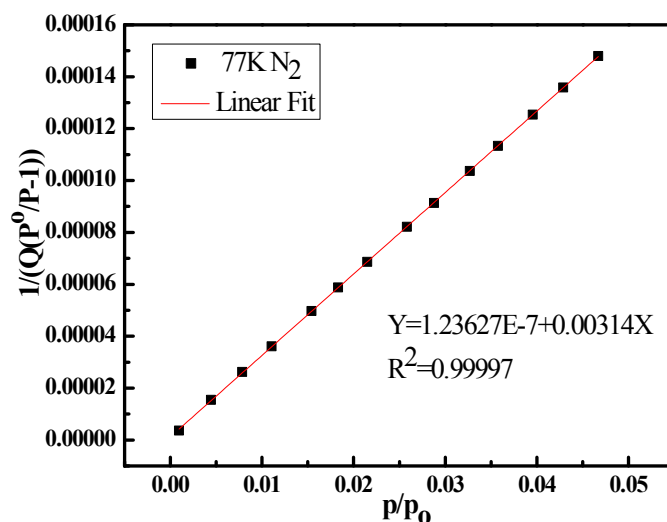

$$S_{\text{BET}} = (1 / (1.23627 \times 10^{-7} + 0.00314)) / 22414 \times 6.023 \times 10^{23} \times 0.162 \times 10^{-18} = 1386.31 \text{ m}^2/\text{g}$$

Fig. S5. BET plot of ZJU-9a under the activation of 25 °C .

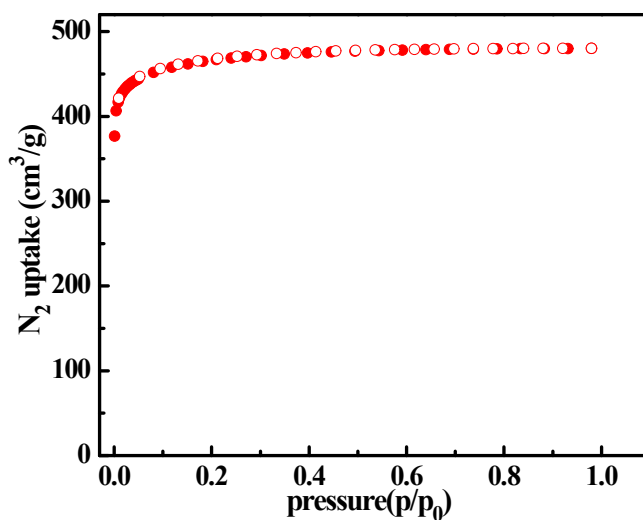

Fig. S6. N<sub>2</sub> sorption isotherm of ZJU-9a at 77 K under the activation of 60 °C. Solid symbols: adsorption, open symbols: desorption.

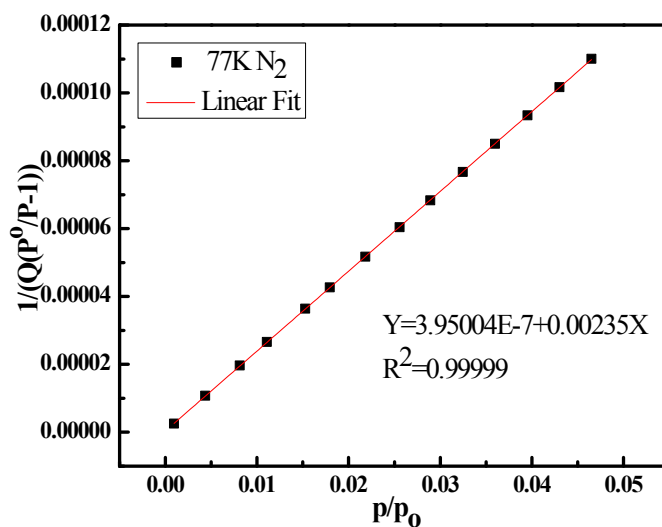

$$S_{\text{BET}} = (1 / (3.95004 \times 10^{-7} + 0.00235)) / 22414 \times 6.023 \times 10^{23} \times 0.162 \times 10^{-18} = 1852.11 \text{ m}^2/\text{g}$$

Fig. S7. BET plot of ZJU-9a under the activation of 60 °C .

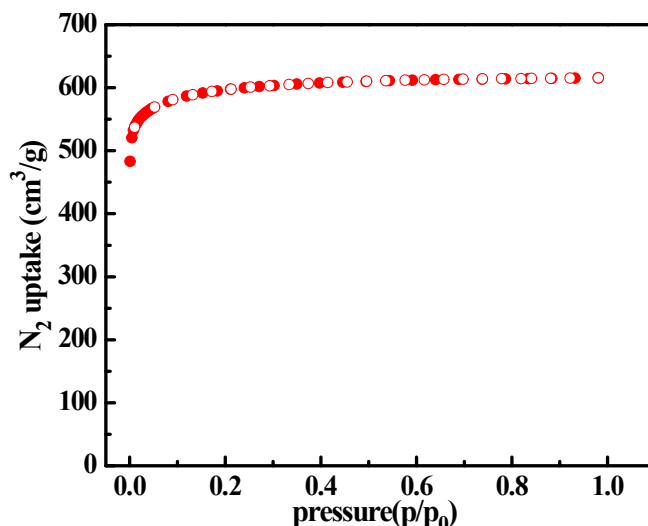

Fig. S8. N<sub>2</sub> sorption isotherm of ZJU-9a at 77 K under the activation of 100 °C. Solid symbols: adsorption, open symbols: desorption.

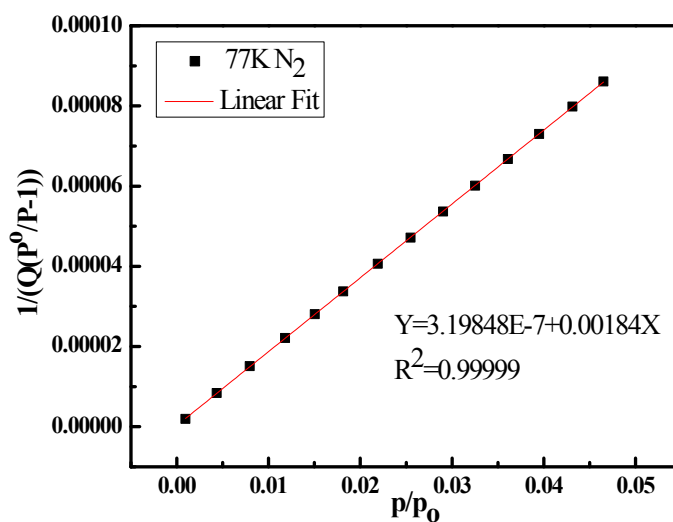

$$S_{\text{BET}} = (1 / (3.19848 \times 10^{-7} + 0.00184)) / 22414 \times 6.023 \times 10^{23} \times 0.162 \times 10^{-18} = 2365.45 \text{ m}^2/\text{g}$$

Fig. S9. BET plot of ZJU-9a under the activation of 100 °C .

Table S1. Crystallographic Data Collection and Refinement Results for ZJU-9.

| ZJU-9            |                                                 |
|------------------|-------------------------------------------------|
| Chemical formula | C <sub>13</sub> H <sub>6</sub> CuO <sub>5</sub> |
| Formula weight   | 305.72                                          |
| Temperature(K)   | 296(2)                                          |
| Wavelength(Å)    | 0.71073                                         |
| Crystal system   | Trigonal                                        |
| Space group      | C -3m                                           |

---

|                                                     |                |
|-----------------------------------------------------|----------------|
| a(Å)                                                | 18.4284 (17)   |
| b(Å)                                                | 18.4284 (17)   |
| c(Å)                                                | 40.081(3)      |
| V(Å <sup>3</sup> )                                  | 11788(2)       |
| Z                                                   | 18             |
| Density(calculated g/cm <sup>3</sup> )              | 0.775          |
| Absorbance coefficient(mm <sup>-1</sup> )           | 0.839          |
| F(000)                                              | 2754           |
| Crystal size(mm <sup>3</sup> )                      | 0.26×0.25×0.21 |
| Goodness of fit on F <sup>2</sup>                   | 1.053          |
| R <sub>1</sub> ,wR <sub>2</sub> [I>2σ(I)]           | 0.0800, 0.2093 |
| R <sub>1</sub> ,wR <sub>2</sub> (all data)          | 0.1494, 0.2598 |
| Largest difference peak and hole(e/Å <sup>3</sup> ) | 1.179, -0.448  |
| CCDC                                                | 1406720        |

---

1. *CrysAlisPro*, version 1.171.33.56; Oxford Diffraction Ltd.: Oxfordshire, U.K., 2010
2. Sheldrick, G. M. Program for Structure Refinement; Germany, 1997.
3. Spek, L. PLATON: The University of Utrecht: Utrecht, The Netherlands, 1999.
